# Supplementary material for: Central-metal exchange, improved catalytic activity, photoluminescence properties of a new family of d10 coordination polymers based on the 5,5′-(1H-2,3,5-triazole-1,4-diyl)diisophthalic acid ligand
Source: Royal Society of Chemistry journal article supplement (doi:10.1039/c6dt00726k), 2016-01-01
Supplement: c6dt00726k1.pdf [file c6dt00726k1.pdf]

## ***Supporting Information***

### **Central-metal Exchange, Improved Catalytic Activity, Photoluminescence Properties of A New Family of d<sup>10</sup> Coordination Polymers Based on 5,5'-(1H-2,3,5-triazole-1,4- diyl)diisophthalic Acid Ligand**

*Huarui Wang<sup>a,b</sup>, Chao Huang<sup>a</sup>, Yanbing Han<sup>a</sup>, Zhichao Shao<sup>a</sup>, Hongwei Hou<sup>a,\*</sup>, Yaoting Fan<sup>a</sup>*

<sup>a</sup> *College of Chemistry and Molecular Engineering, Zhengzhou University, Zhengzhou, Henan, 450052, P. R. China.*

*E-mail: [huhongw@zzu.edu.cn](mailto:huhongw@zzu.edu.cn); Fax : (86)371-67761744.*

<sup>b</sup> *College of Chemistry and Chemical Engineering, Luoyang Normal University, Luoyang, Henan, 471022, P. R. China.*

## **Contents**

- 1. PXRD analysis of 1-5.***
- 2. TGA analysis of 1-5.***
- 3. Photoluminescence Properties of H<sub>4</sub>L and 1-5.***
- 4. Selected Bond Distances (Å) and Angles (deg) for 1-5.***
- 5. PXRD analysis of 2 and exchange products 2a-2c.***
- 6. Reusability experiment of 2a.***
- 7. <sup>1</sup>H NMR spectra for 7a and 7b.***

## 1. PXRD analysis of 1-5.

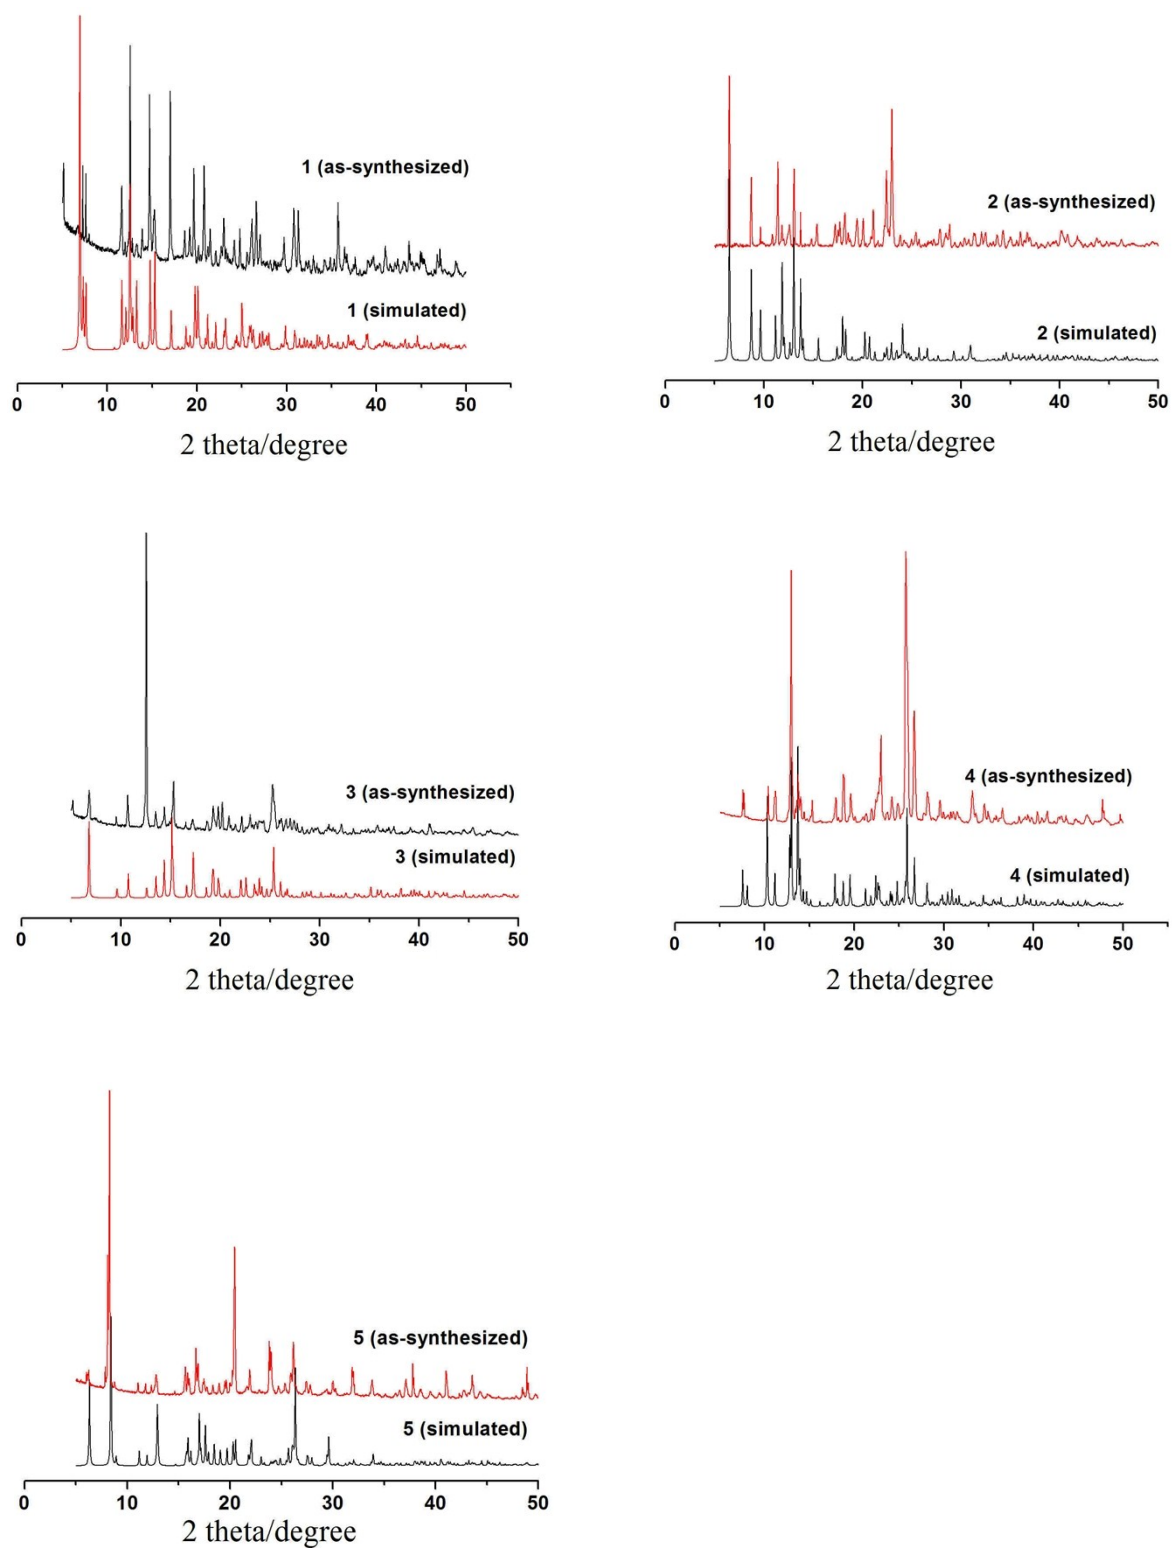

**Fig. S1** Experimental and simulated PXRD patterns of **1-5** (as-synthesized).

## 2. TGA analysis of 1-5.

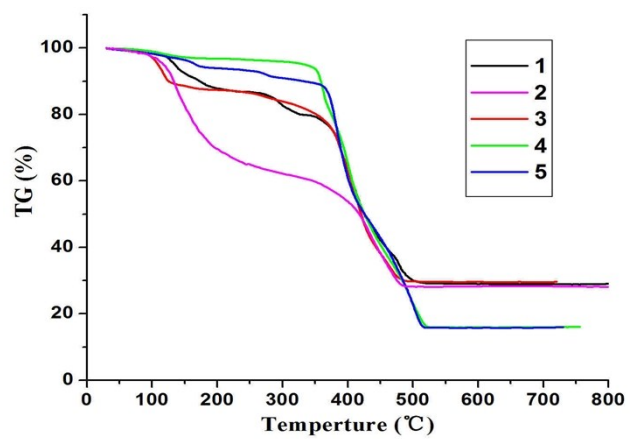

Fig. S2 TGA curves of 1-5.

### 3. Photoluminescence Properties of H<sub>4</sub>L and 1-5.

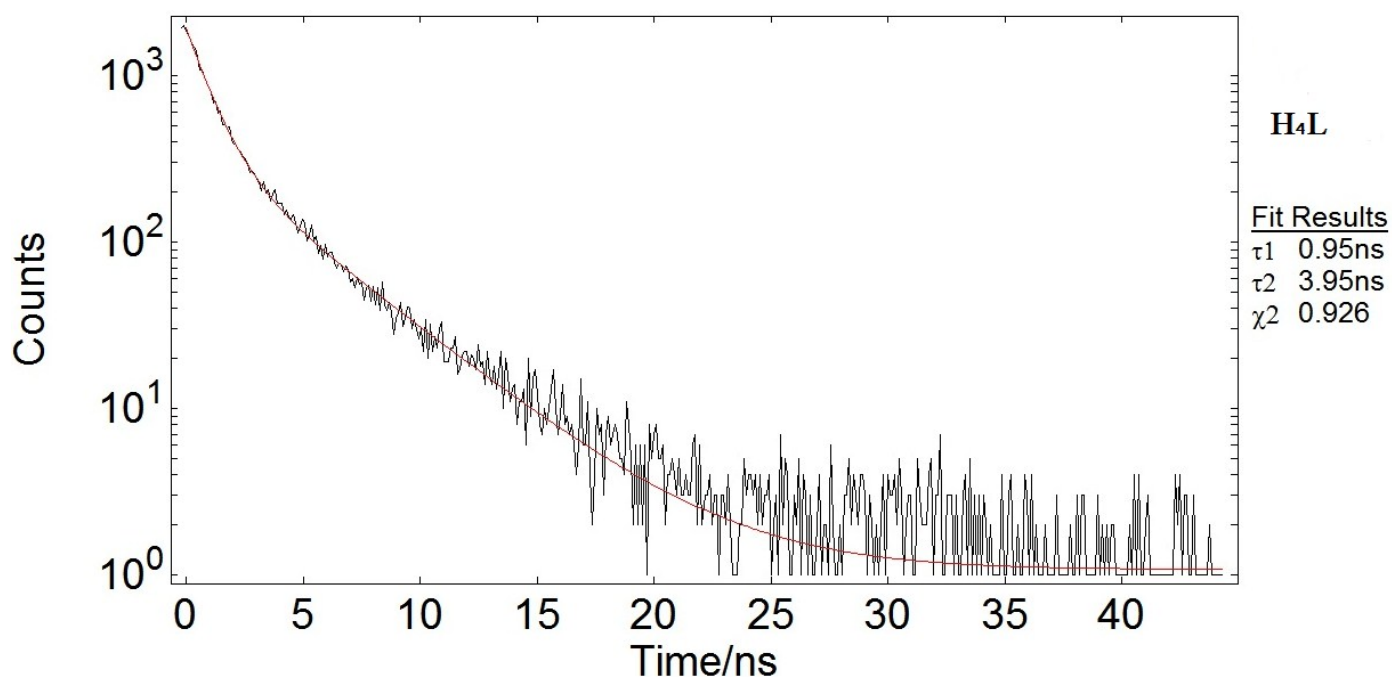

Fig. S3 Emission decay trace and biexponential fit for the free ligand H<sub>4</sub>L at room temperature.

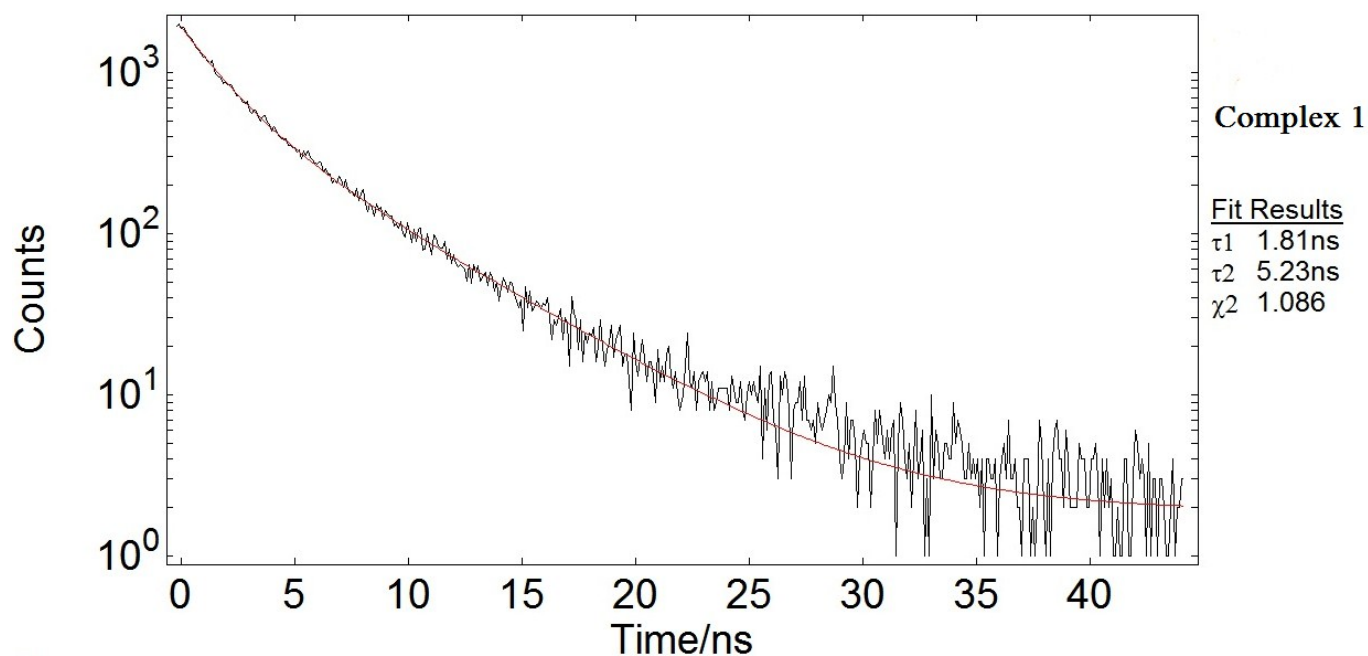

Fig. S4 Emission decay trace and biexponential fit for **1** ( $\lambda_{em} = 439$  nm) at room temperature.

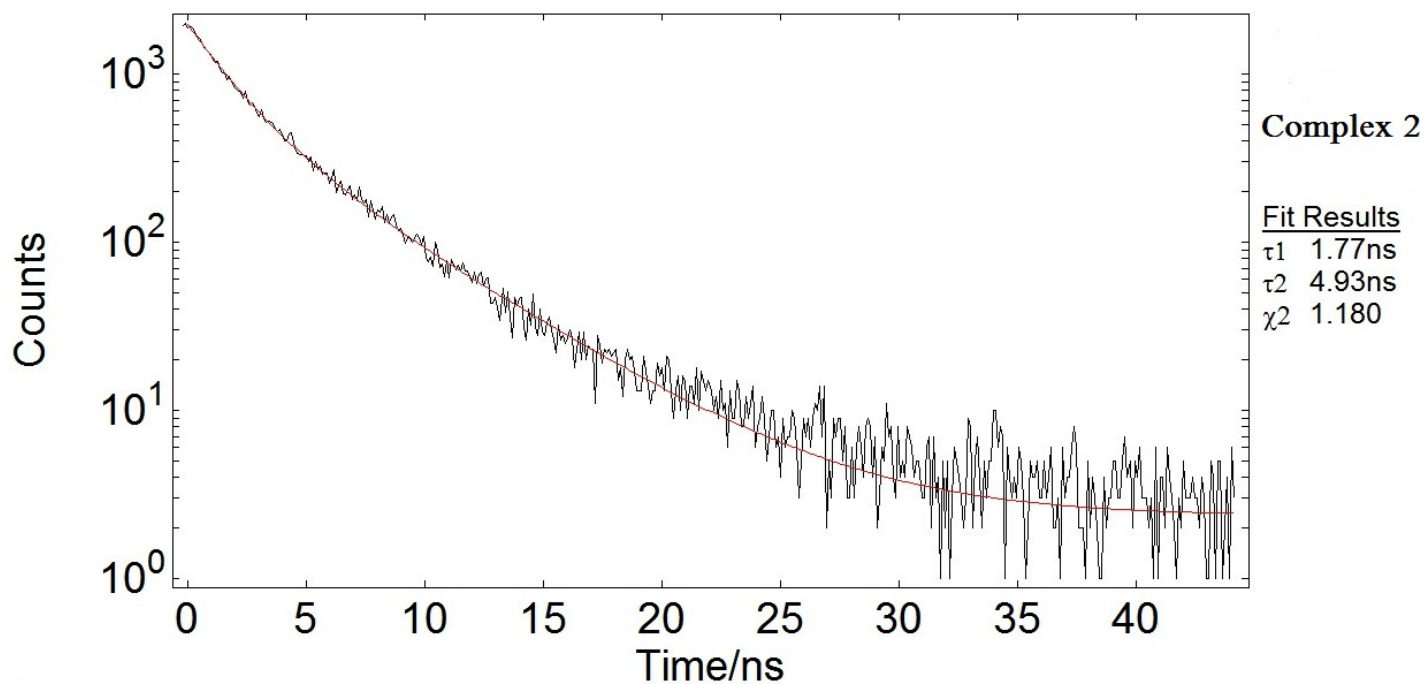

Fig. S5 Emission decay trace and biexponential fit for **2** ( $\lambda_{em} = 423$  nm) at room temperature.

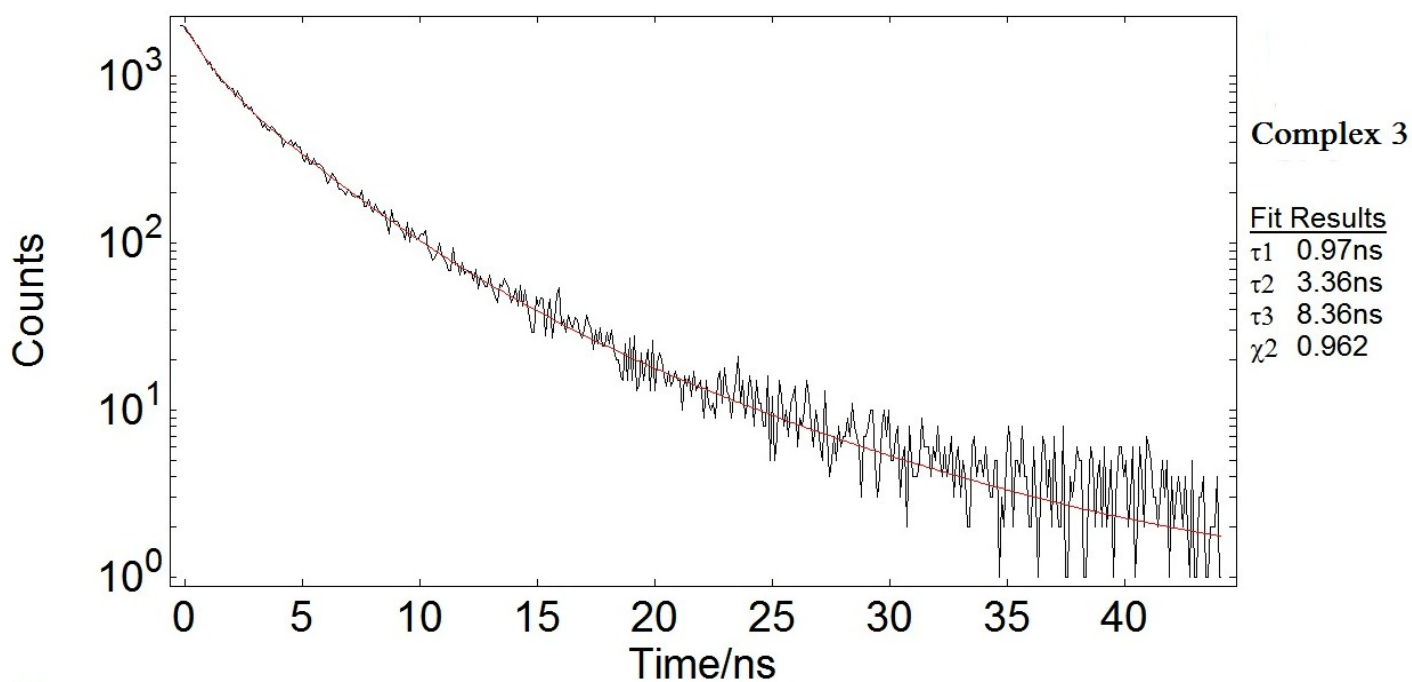

Fig. S6 Emission decay trace and triexponential fit for **3** ( $\lambda_{em} = 441$  nm) at room temperature.

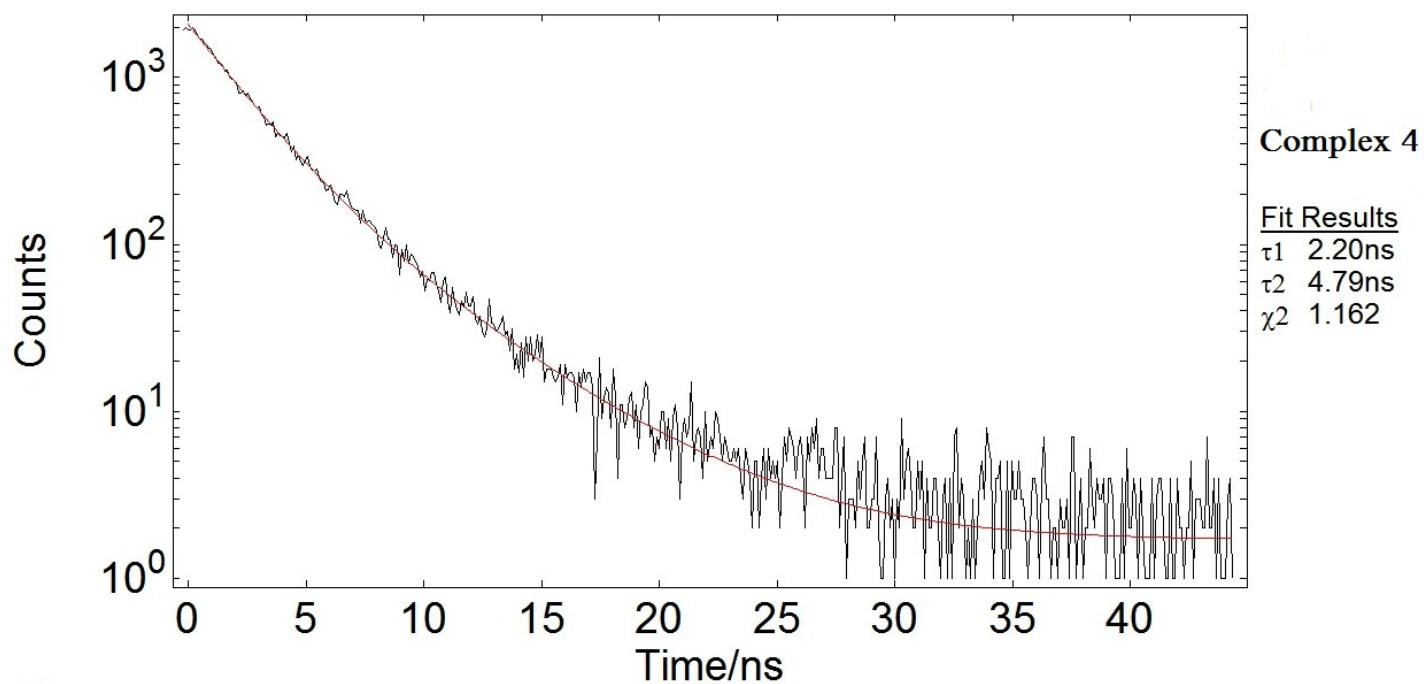

**Fig. S7** Emission decay trace and biexponential fit for **4** ( $\lambda_{em} = 442$  nm) at room temperature.

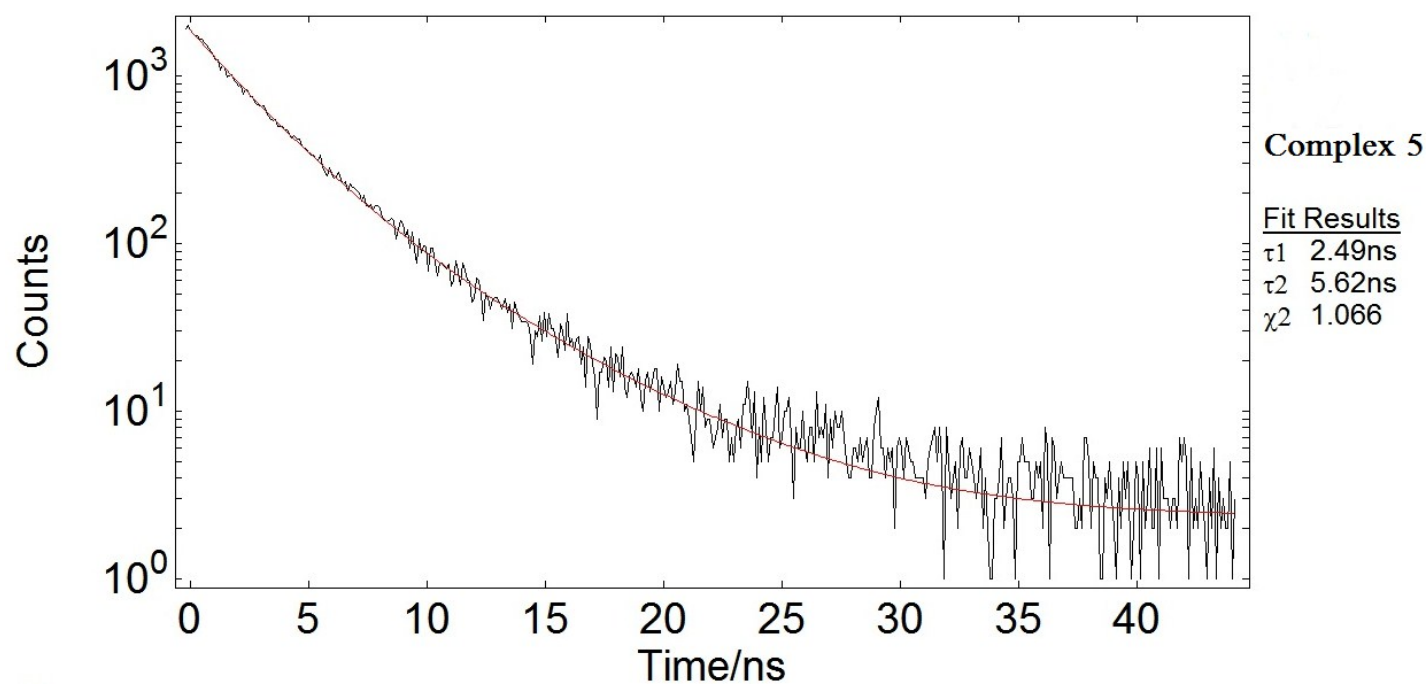

**Fig. S8** Emission decay trace and biexponential fit for **5** ( $\lambda_{em} = 448$  nm) at room temperature.

## 4. Selected Bond Distances (Å) and Angles (deg) for 1-5.

Table S1 Selected Bond Distances (Å) and Angles (deg) for 1-5.

| 1                   |            |                     |            |
|---------------------|------------|---------------------|------------|
| Cd(1)-O(1)          | 2.252(4)   | Cd(2)-O(5)#4        | 2.163(2)   |
| Cd(1)-O(6)#1        | 2.263(3)   | Cd(2)-O(5)#1        | 2.163(2)   |
| Cd(1)-O(9)          | 2.290(4)   | Cd(2)-O(2)          | 2.352(3)   |
| Cd(1)-O(8)#2        | 2.298(3)   | Cd(2)-O(2)#5        | 2.352(3)   |
| Cd(1)-O(3)#3        | 2.407(3)   | Cd(2)-O(3)#6        | 2.358(3)   |
| Cd(1)-O(7)#2        | 2.590(3)   | Cd(2)-O(3)#3        | 2.358(3)   |
| Cd(1)-O(4)#3        | 2.592(4)   | O(1)-Cd(1)-O(6)#1   | 131.28(12) |
| O(1)-Cd(1)-O(9)     | 89.44(16)  | O(1)-Cd(1)-O(4)#3   | 75.07(15)  |
| O(6)#1-Cd(1)-O(9)   | 82.59(14)  | O(6)#1-Cd(1)-O(4)#3 | 129.92(15) |
| O(1)-Cd(1)-O(8)#2   | 133.88(11) | O(9)-Cd(1)-O(4)#3   | 146.41(14) |
| O(6)#1-Cd(1)-O(8)#2 | 93.43(11)  | O(8)#2-Cd(1)-O(4)#3 | 84.48(12)  |
| O(9)-Cd(1)-O(8)#2   | 85.42(14)  | O(3)#3-Cd(1)-O(4)#3 | 51.44(11)  |
| O(1)-Cd(1)-O(3)#3   | 89.55(13)  | O(7)#2-Cd(1)-O(4)#3 | 69.03(12)  |
| O(6)#1-Cd(1)-O(3)#3 | 83.20(10)  | O(5)#4-Cd(2)-O(5)#1 | 180.00(13) |
| O(9)-Cd(1)-O(3)#3   | 160.13(11) | O(5)#4-Cd(2)-O(2)   | 88.25(11)  |
| O(8)#2-Cd(1)-O(3)#3 | 109.25(13) | O(5)#1-Cd(2)-O(2)   | 91.75(11)  |
| O(1)-Cd(1)-O(7)#2   | 81.18(12)  | O(5)#4-Cd(2)-O(2)#5 | 91.75(11)  |
| O(6)#1-Cd(1)-O(7)#2 | 142.59(11) | O(5)#1-Cd(2)-O(2)#5 | 88.25(11)  |
| O(9)-Cd(1)-O(7)#2   | 79.38(12)  | O(2)-Cd(2)-O(2)#5   | 180.000(1) |
| O(8)#2-Cd(1)-O(7)#2 | 52.81(12)  | O(5)#4-Cd(2)-O(3)#6 | 89.13(10)  |
| O(3)#3-Cd(1)-O(7)#2 | 120.02(10) | O(5)#1-Cd(2)-O(3)#6 | 90.87(10)  |
| O(2)-Cd(2)-O(3)#6   | 98.10(11)  | O(2)-Cd(2)-O(3)#3   | 81.90(11)  |



|                     |           |                     |            |
|---------------------|-----------|---------------------|------------|
| O(2)#5-Cd(2)-O(3)#6 | 81.90(11) | O(2)#5-Cd(2)-O(3)#3 | 98.10(11)  |
| O(5)#4-Cd(2)-O(3)#3 | 90.87(10) | O(3)#6-Cd(2)-O(3)#3 | 180.000(1) |
| O(5)#1-Cd(2)-O(3)#3 | 89.13(10) |                     |            |

---

**2**

---

|                   |            |                     |            |
|-------------------|------------|---------------------|------------|
| Cd(1)-O(2)#1      | 2.354(5)   | N(2)-Cd(1)-O(4)     | 91.8(2)    |
| Cd(1)-N(1)        | 2.369(4)   | O(2)#1-Cd(1)-O(5)   | 141.48(17) |
| Cd(1)-N(3)        | 2.364(9)   | N(1)-Cd(1)-O(5)     | 85.37(17)  |
| Cd(1)-N(2)        | 2.376(4)   | N(3)-Cd(1)-O(5)     | 82.0(3)    |
| Cd(1)-O(4)        | 2.391(5)   | N(2)-Cd(1)-O(5)     | 92.07(17)  |
| O(2)#1-Cd(1)-N(3) | 136.5(3)   | O(4)-Cd(1)-O(5)     | 54.79(17)  |
| N(1)-Cd(1)-N(3)   | 93.6(3)    | O(2)#1-Cd(1)-O(3)#1 | 54.51(18)  |
| O(2)#1-Cd(1)-N(2) | 90.52(19)  | N(1)-Cd(1)-O(3)#1   | 87.85(19)  |
| N(1)-Cd(1)-N(2)   | 177.44(17) | N(3)-Cd(1)-O(3)#1   | 82.6(3)    |
| N(3)-Cd(1)-N(2)   | 86.0(3)    | N(2)-Cd(1)-O(3)#1   | 94.6(2)    |
| O(2)#1-Cd(1)-O(4) | 86.72(18)  | O(4)-Cd(1)-O(3)#1   | 140.67(19) |
| N(1)-Cd(1)-O(4)   | 86.8(2)    | O(5)-Cd(1)-O(3)#1   | 162.69(19) |
| N(3)-Cd(1)-O(4)   | 136.6(3)   |                     |            |

---

**3**

---

|                  |          |                  |           |
|------------------|----------|------------------|-----------|
| Cd(1)-O(11)      | 2.265(7) | Cd(2)-O(1)       | 2.230(7)  |
| Cd(1)-O(8)       | 2.295(7) | Cd(2)-O(13)      | 2.262(7)  |
| Cd(1)-O(9)       | 2.323(9) | Cd(2)-O(14)      | 2.339(10) |
| Cd(1)-O(6)#1     | 2.369(7) | Cd(2)-O(3)#2     | 2.350(7)  |
| Cd(1)-O(10)      | 2.374(9) | Cd(2)-O(4)#2     | 2.436(7)  |
| Cd(1)-O(5)#1     | 2.434(7) | Cd(2)-O(12)      | 2.444(10) |
| Cd(1)-O(7)       | 2.502(7) | O(11)-Cd(1)-O(8) | 139.2(3)  |
| O(11)-Cd(1)-O(9) | 109.1(3) | O(1)-Cd(2)-O(13) | 124.6(3)  |
| O(8)-Cd(1)-O(9)  | 84.8(3)  | O(1)-Cd(2)-O(14) | 102.6(3)  |

|                     |          |                     |          |
|---------------------|----------|---------------------|----------|
| O(11)-Cd(1)-O(6)#1  | 125.6(3) | O(13)-Cd(2)-O(14)   | 89.8(3)  |
| O(8)-Cd(1)-O(6)#1   | 91.1(2)  | O(1)-Cd(2)-O(3)#2   | 91.2(3)  |
| O(9)-Cd(1)-O(6)#1   | 90.6(3)  | O(13)-Cd(2)-O(3)#2  | 142.4(3) |
| O(11)-Cd(1)-O(10)   | 84.7(3)  | O(14)-Cd(2)-O(3)#2  | 93.0(3)  |
| O(8)-Cd(1)-O(10)    | 78.9(3)  | O(1)-Cd(2)-O(4)#2   | 145.2(3) |
| O(9)-Cd(1)-O(10)    | 163.6(3) | O(13)-Cd(2)-O(4)#2  | 90.1(3)  |
| O(6)#1-Cd(1)-O(10)  | 88.1(3)  | O(14)-Cd(2)-O(4)#2  | 76.6(3)  |
| O(11)-Cd(1)-O(5)#1  | 78.7(3)  | O(3)#2-Cd(2)-O(4)#2 | 54.4(2)  |
| O(8)-Cd(1)-O(5)#1   | 142.1(2) | O(1)-Cd(2)-O(12)    | 91.5(3)  |
| O(9)-Cd(1)-O(5)#1   | 81.5(3)  | O(13)-Cd(2)-O(12)   | 89.9(3)  |
| O(6)#1-Cd(1)-O(5)#1 | 54.0(2)  | O(14)-Cd(2)-O(12)   | 163.1(3) |
| O(10)-Cd(1)-O(5)#1  | 110.6(3) | O(3)#2-Cd(2)-O(12)  | 77.1(3)  |
| O(11)-Cd(1)-O(7)    | 86.8(3)  | O(4)#2-Cd(2)-O(12)  | 86.4(3)  |
| O(8)-Cd(1)-O(7)     | 54.8(2)  | O(10)-Cd(1)-O(7)    | 84.4(3)  |
| O(9)-Cd(1)-O(7)     | 87.5(3)  | O(5)#1-Cd(1)-O(7)   | 157.8(2) |
| O(6)#1-Cd(1)-O(7)   | 145.9(3) |                     |          |

---

4

---

|                     |            |                     |            |
|---------------------|------------|---------------------|------------|
| Zn(1)-O(1)          | 1.953(4)   | Zn(1)-O(5)#2        | 1.972(4)   |
| Zn(1)-O(7)#1        | 1.957(4)   | Zn(1)-O(3)#3        | 2.022(4)   |
| O(1)-Zn(1)-O(5)#2   | 129.27(18) | O(1)-Zn(1)-O(3)#3   | 108.04(19) |
| O(7)#1-Zn(1)-O(5)#2 | 99.95(19)  | O(7)#1-Zn(1)-O(3)#3 | 101.44(19) |
| O(1)-Zn(1)-O(7)#1   | 116.21(18) | O(5)#2-Zn(1)-O(3)#3 | 97.43(18)  |

---

5

---

|                   |            |                   |            |
|-------------------|------------|-------------------|------------|
| Zn(1)-O(7)        | 1.940(3)   | Zn(1)-O(6)#2      | 2.001(3)   |
| Zn(1)-O(3)#1      | 1.961(3)   | Zn(1)-N(4)        | 2.018(3)   |
| O(7)-Zn(1)-O(3)#1 | 101.82(11) | O(7)-Zn(1)-N(4)   | 120.75(13) |
| O(7)-Zn(1)-O(6)#2 | 111.98(12) | O(3)#1-Zn(1)-N(4) | 111.16(12) |

Symmetry transformations used to generate equivalent atoms:

**1:** #1  $x+1, -y+2, z+1/2$ ; #2  $x+1/2, y+1/2, z$ ; #3  $x, -y+2, z-1/2$ ; #4  $-x, y, -z+3/2$ ; #5  $-x+1, -y+2, -z+2$ ; #6  $-x+1, y, -z+5/2$ .

**2:** #1  $-x+1/2, y+1/2, -z+1/2$ .

**3:** #1  $x, -y+1/2, z+1/2$ ; #2  $-x, y-1/2, -z+1/2$ .

**4:** #1  $x+1, y+1, z$ ; #2  $-x+2, y+1/2, -z+1/2$ ; #3  $-x+2, -y+2, -z$ .

**5:** #1  $x+1, y, z+1$ ; #2  $-x+2, -y+2, -z+2$ ; #3  $x-1, y, z-1$ ; #4  $-x+4, -y+1, -z+2$ .

---

## 5. PXRD analysis of 2 and exchange products 2a-2c.

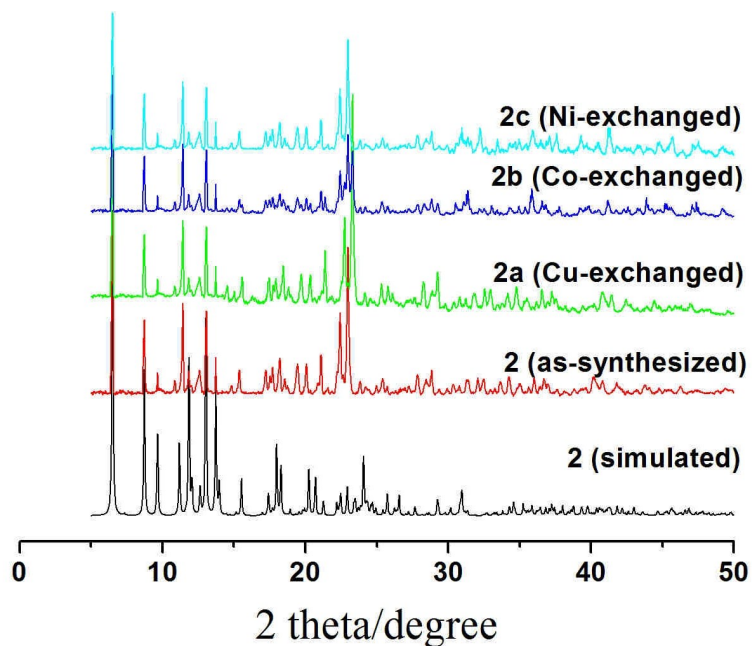

Fig. S9 Experimental and simulated PXRD patterns of 2 and 2a-2c (as-synthesized).

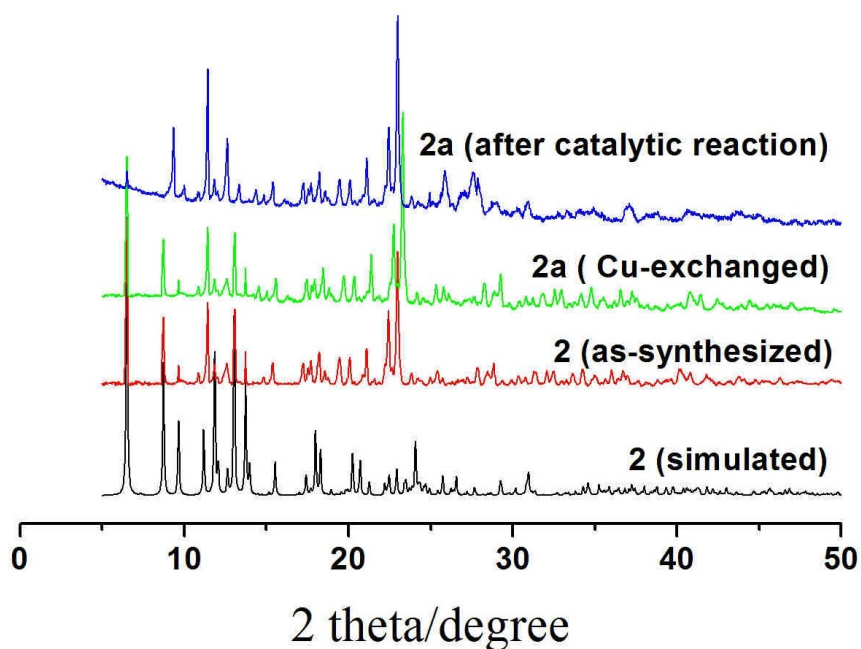

Fig. S10 Comparison of the PXRD patterns of 2a before and after catalysis.

## 6. Reusability experiment of 2a.

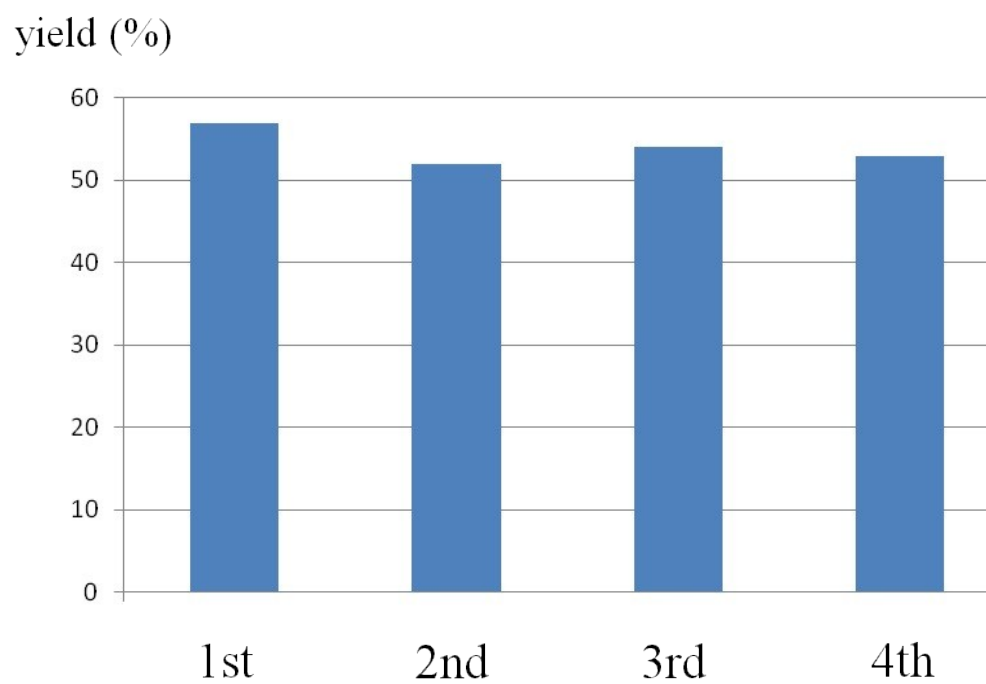

**Fig. S11** Recyclability test of complex **2a** for the synthesis of **7b**.

## 7. <sup>1</sup>H NMR spectra for 7a and 7b.

### 2-Phenyl-1,4,5,6-tetrahydropyrimidine (7a).

<sup>1</sup>H NMR (300 MHz, CDCl<sub>3</sub>): δ = 7.62–7.60 (d, *J* = 6.6 Hz, 2 H), 7.36–7.29 (m, 3 H), 3.41–3.37 (t, *J* = 5.7 Hz, 4 H), 1.80–1.73 (m, 2 H).

### 2-(Pyridin-4-yl)-1,4,5,6-tetrahydropyrimidine (7b).

<sup>1</sup>H NMR (300 MHz, CDCl<sub>3</sub>): δ = 8.61–8.59 (d, *J* = 8.1 Hz, 2 H), 7.54–7.52 (d, *J* = 8.4 Hz, 2 H), 3.51–3.47 (t, *J* = 5.7 Hz, 4 H), 1.87–1.81 (m, 2 H).

<sup>1</sup>H NMR data of **7a-b** are matched with those in previous papers.<sup>1</sup>

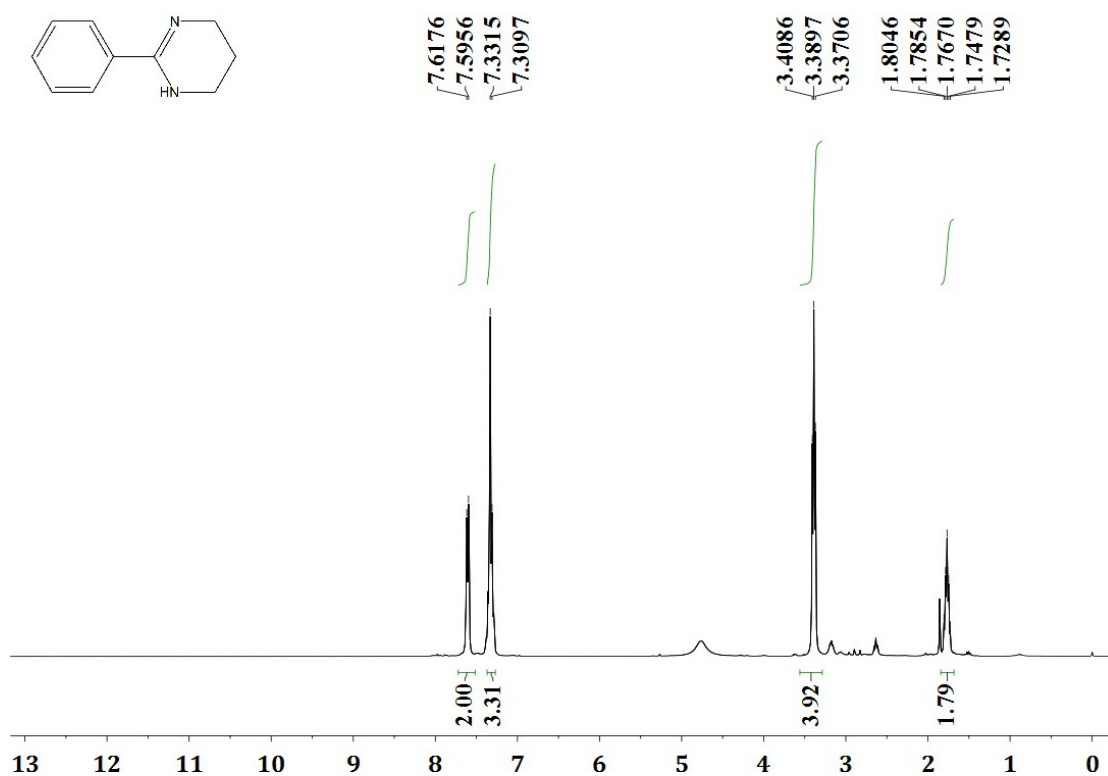

<sup>1</sup>H NMR spectrum of compound **7a**

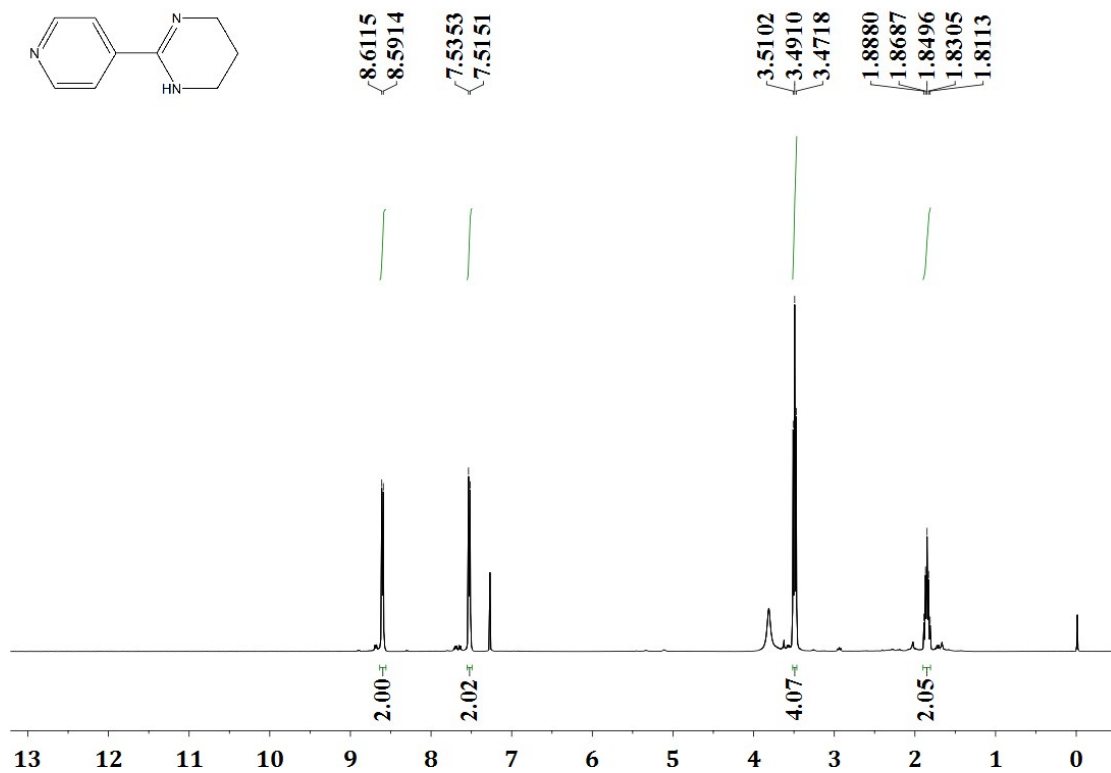

<sup>1</sup>H NMR spectrum of compound **7b**

References:

- (1) (a) S. J. An, B. Yin, P. Liu, L X. G. i, C. Li, J. L. Li, Z. Shi, *Synthesis*, 2013, **45**, 2525–2532. (b) M. Ishihara, H. Togo, *Tetrahedron*, 2007, **63**, 1474–1480.
